# Supplementary material for: Four subgroups based on tau levels in Alzheimer’s disease observed in two independent cohorts
Source: Alzheimers Res Ther. 2021 Jan 4;13:2. doi: 10.1186/s13195-020-00713-3 (PMC7780683; doi:10.1186/s13195-020-00713-3)
Supplement: Supplementary file 2 — Additional file 2. [file 13195_2020_713_MOESM2_ESM.xlsx]

## Sheet: Sheet 1
Additional file 2. Model fit for mixtures with different number of components. Fit parameters for each comparison are indicated as log-likelihood ratio; p value for fit.
		Number of distributions compared
Biomarker: platform	Cohort	1 versus 2	2 versus 3	3 versus 4	4 versus 5
t-tau: Innotest	ADC	1023.7; p< .001	410.9; p < .001	97.2; p< .001	3.9; p= .51
p-tau: Innotest	ADC	622.3; p< .001	217.3; p< .001	28.3; p< .001	15; p= .08
t-tau: Luminex	ADNI	471.8; p<.001	90.9; p=0.01	25.2; p=.02	11.2; p=.08
p-tau: Luminex	ADNI	485.7; p< .001	134.6; p< .001	54.3; p=0.01	20.3; p= .05
t-tau: Elecsys	ADNI	282.6; p< .001	59.1; p< .001	12.4; p=.04	7.1; p=.21
p-tau: Elecsys	ADNI	359.5; p< .001	93.8; p< .001	19.6; p< .001	10.6; p= .17
